# Supplementary material
Source: Springer Nature journal article supplement (https://www.springermedizin.de/resource/supplementary/12889_2013_6080_MOESM3_ESM.pdf/9494320)
Supplement: MOESM3 [file 9494320]

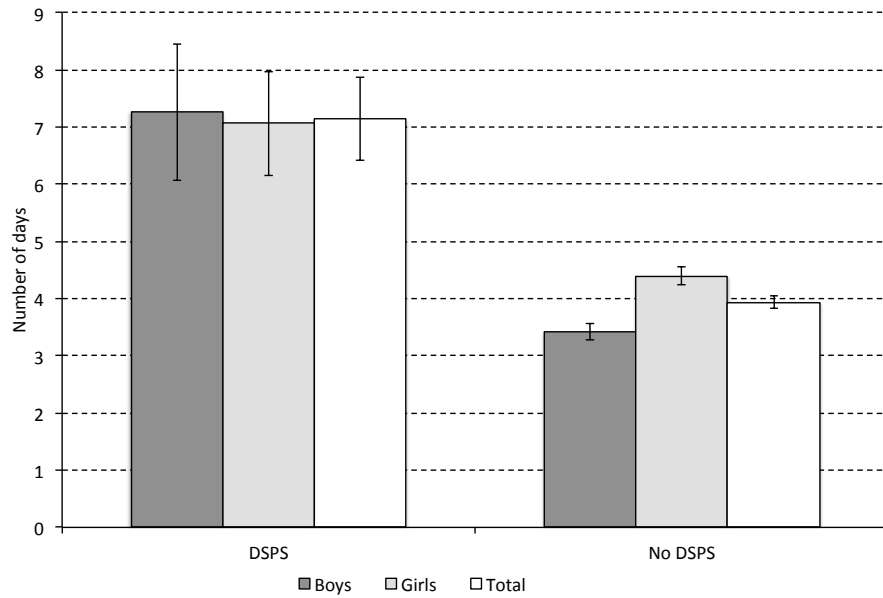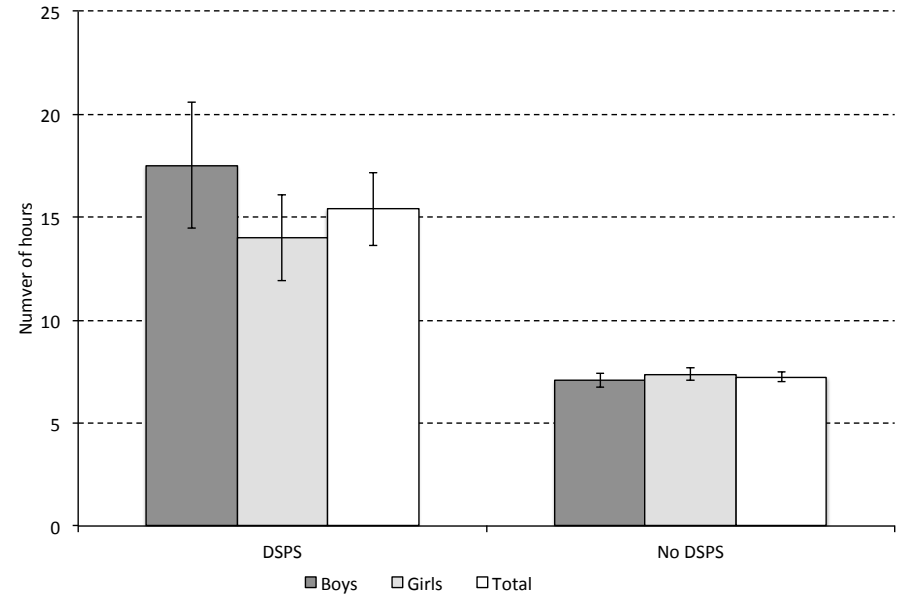

**Figure 3.** Mean number of days and hours of non-attendance during the last six months among boys and girls with and without delayed sleep phase syndrome (DSDPS) in the ung@hordaland study (n=9846). Error bars represent 95% confidence intervals.
